# Matrix Stiffness Regulates Endothelial Cell Proliferation through Septin 9

Yi-Ting Yeh<sup>1,2,3,4</sup>, Sung Sik Hur<sup>1,2</sup>, Joann Chang<sup>1,2</sup>, Kuei-Chun Wang<sup>1,2</sup>, Jeng-Jiann Chiu<sup>3</sup>, Yi-Shuan Li<sup>1,2</sup>, Shu Chien<sup>1,2\*</sup>

**1** Department of Bioengineering, University of California San Diego, La Jolla, California, United States of America, **2** The Institute of Engineering in Medicine, University of California San Diego, La Jolla, California, United States of America, **3** Division of Medical Engineering Research, National Health Research Institutes, Zhunan, Taiwan, **4** Institute of Bioinformatics and Structural Biology and Department of Life Science, National Tsing-Hua University, Hsinchu, Taiwan

## Abstract

Endothelial proliferation, which is an important process in vascular homeostasis, can be regulated by the extracellular microenvironment. In this study we demonstrated that proliferation of endothelial cells (ECs) was enhanced on hydrogels with high stiffness (HSG, 21.5 kPa) in comparison to those with low stiffness (LSG, 1.72 kPa). ECs on HSG showed markedly prominent stress fibers and a higher RhoA activity than ECs on LSG. Blockade of RhoA attenuated stress fiber formation and proliferation of ECs on HSG, but had little effect on ECs on LSG; enhancement of RhoA had opposite effects. The phosphorylations of Src and Vav2, which are positive RhoA upstream effectors, were higher in ECs on HSG. The inhibition of Src/Vav2 attenuated the HSG-mediated RhoA activation and EC proliferation but exhibited nominal effects on ECs on LSG. Septin 9 (SEPT9), the negative upstream effector for RhoA, was significantly higher in ECs on LSG. The inhibition of SEPT9 increased RhoA activation, Src/Vav2 phosphorylations, and EC proliferation on LSG, but showed minor effects on ECs on HSG. We further demonstrated that the inactivation of integrin  $\alpha_v\beta_3$  caused an increase of SEPT9 expression in ECs on HSG to attenuate Src/Vav2 phosphorylations and inhibit RhoA-dependent EC proliferation. These results demonstrate that the SEPT9/Src/Vav2/RhoA pathway constitutes an important molecular mechanism for the mechanical regulation of EC proliferation.

**Citation:** Yeh Y-T, Hur SS, Chang J, Wang K-C, Chiu J-J, et al. (2012) Matrix Stiffness Regulates Endothelial Cell Proliferation through Septin 9. PLoS ONE 7(10): e46889. doi:10.1371/journal.pone.0046889

**Editor:** Nic D. Leipzig, The University of Akron, United States of America

**Received:** June 2, 2012; **Accepted:** September 6, 2012; **Published:** October 31, 2012

**Copyright:** © 2012 Yeh et al. This is an open-access article distributed under the terms of the Creative Commons Attribution License, which permits unrestricted use, distribution, and reproduction in any medium, provided the original author and source are credited.

**Funding:** This work was supported in part by National Institutes of Health Research Grants HL104402 and HL106579 (S.C.), NSC-101-2325-B-400-009 and NSC-100-2321-B-400-001 (J.-J.C.), and NSC-99-2911-I-009-101 to UST-UCSD International Center of Excellence in Advanced Bioengineering (to S.C. and J.-J.C.). The funders had no role in study design, data collection and analysis, decision to publish, or preparation of the manuscript.

**Competing Interests:** The authors have declared that no competing interests exist.

\* E-mail: shuchien@ucsd.edu

## Introduction

Many pathological conditions, such as vessel injury or tumor formation, alter the extracellular microenvironment for cells and influence cellular functions including proliferation and migration. It has been documented that the stiffness of arteries increases with the progression of vascular disease, hypertension, and diabetes [1–3]. In addition, tumor vasculature also exhibits a stiffer microenvironment [4]. Endothelial cells (ECs) lining the vessel wall control vascular permeability and homeostasis, and their dysfunction, such as inflammation and proliferation, may lead to the development of vascular diseases and tumor angiogenesis. Changes of the extracellular matrix (ECM) stiffness can influence EC functions [5,6]. On soft collagen gels ECs show capillary morphogenesis, whereas on stiff gels the EC capillary network decreases [7] and spreading area increases [8]. EC spreading and focal adhesion formation are attenuated in ECs co-cultured with smooth muscle cells (SMCs, with the SMC layer serving as a soft substrate) and in ECs seeded on soft polyacrylamide gels in comparison to ECs on hard surfaces [9]. Such EC-SMC co-cultures serve as a model of the healthy vessel wall to inhibit the TNF- $\alpha$ -induced EC inflammation [10]. Moreover, ECs derived from tumor stromas with high stiffness show distinct differences in structure, signaling, and function when compared with ECs from normal tissues [11].

While these studies demonstrate that ECM mechanics play a pivotal role in regulating EC functions, the molecular mechanisms by which ECs respond to the altered ECM mechanics to regulate cell proliferation remain to be elucidated.

Cells respond to changes in their mechanical surroundings (e.g., alterations of substrate stiffness) by reorganizing their cytoskeleton, thus adjusting the contractile force exerted on the substrate and modifying their biological and mechanical behaviors [12]. The adherent cells sense the environmental changes through the ECM-integrin interactions to transmit structural and biochemical signals, and such outside-in signals activate a Rho-GTPase-modulated feedback loop. This in turn regulates intracellular contraction to generate force (inside-out) through the cytoskeleton to further enhance the integrin clustering and focal adhesion assembly. The balance of the outside-in and inside-out signaling leads to the regulation of adhesion-mediated cell functions such as proliferation [13,14].

Rho-GTPase, a major player for cytoskeleton dynamics and cell contractility (cellular tension), is positively regulated by guanine nucleotide exchange factors (GEFs) and negatively regulated by GTPase activating proteins (GAPs) [15]. It has been reported that ECM stiffness can alter the cellular force balance and in turn activate Rho-mediated contractility (tension) to enhance tumor

growth [14]. Src has also been reported to be an important regulator in modulating GEF and GAP activities [16]. Under mechanical stretch, Src activation causes the phosphorylation of Vav2, a ubiquitously expressed GEF, to increase the Rho-GTPase activity in mesangial cells [17]. A dominant negative mutant of Vav2 attenuates Rho-GTPase activity and blocks stress fiber formation in MDCK cells [18]. Septin 9 (SEPT9) is reported to associate with p114GEF to inhibit Rho-GTPase activity in growing REF cells [19]. Septins are a family of GTP-binding proteins that assemble into filaments to constitute a non-canonical cytoskeleton [20] and have been shown to regulate cortical actin formation and hence, the cortical rigidity of cells [21]. SEPT9 perturbations have been reported in some cases of breast and ovarian cancers, implying that SEPT9 plays a role in regulating cell proliferation and may be a candidate tumor suppressor gene [22,23]. The role of SEPT9 in endothelial mechanotransduction and proliferation, however, has yet to be determined.

In the present study, we identified a novel role of SEPT9 in regulating EC proliferation on substrates with different stiffnesses. We demonstrated that the expression of SEPT9 is increased in ECs cultured on the low-stiffness substrate (LSG) that leads to the attenuation of Src/Vav2 phosphorylations and the inhibition of RhoA-dependent cell cycle progression. These results reveal an important molecular mechanism for the mechanical regulation of EC proliferation.

## Results

### Substrate stiffness modulates stress fiber distribution and cell proliferation in ECs

It has been reported that the matrix stiffness is higher in injured vessels compared with normal and that the increase of stiffness correlates well with cell proliferation [24]. To understand how extracellular environmental cues contribute to EC proliferation, we used polyacrylamide (PA) gels with different degrees of stiffness as cell adhesion/growth substrates to mimic the physiological and pathological conditions [5,24–26]. As shown in Fig. S1, HUVECs were cultured on glass (>60 GPa) and substrates with high (21.5 kPa), medium (9.7 kPa) and low stiffness (1.72 kPa). The resulting EC proliferation decreased as stiffness decreases; statistic analyses demonstrated that no significant difference between the ECs on glass and substrate of 21.5 kPa. These results suggest that 21.5 kPa may have already reached the plateau for substrate stiffness-mediated EC proliferation. ECs were cultured on high-stiffness gel (HSG, 21.5 kPa) and low-stiffness gel (LSG, 1.72 kPa) (Table 1) for various time durations. The images of ECs on HSG and LSG were acquired using an inverted fluorescence microscope (Fig. 1A). As shown in Fig. 1A, cells seeded on HSG showed spindle-like and well-spread morphology, whereas cells on LSG showed a round shape and smaller size. To quantify the actin level in ECs on HSG and LSG, total phalloidin fluorescence staining intensities in the field were normalized against the cell numbers determined by staining with propidium iodide (PI). The results showed that ECs on LSG exhibited a significantly lower actin level than on HSG (Fig. 1B, left panel). The radial distribution of actin in a cell was determined by radial scans taken every 10° (from 0° to 360°). Each radial scan within a cell was partitioned into 30 fractions from cell center to the edge, and the fluorescence intensity averaged at each fractional distance across the cell (Fig. S2). The results showed that the actin level was evenly distributed across the cell body of ECs on HSG (Fig. 1B right panel) and that a preferential distribution of actin in the peripheral cortical layer was observed in ECs on LSG (Fig. 1B, right panel). To assess the effects of different substrate stiffness on EC functions, cell cycle

regulatory proteins and EC proliferation were analyzed. ECs cultured on LSG expressed significantly lower levels of cell cycle promoting regulators, such as cyclin A and hyper-phosphorylated Rb, with a significantly higher level of the cell cycle suppressor protein p27, in comparison with ECs on HSG (Fig. 1C). Flow cytometry analyses showed an increase of G1-phase cells and a decrease of S-phase cells on LSG in comparison to cells on HSG (Fig. 1D) indicating that cell cycle progression is enhanced on HSG in comparison with LSG. These results suggest that substrate stiffness can alter cell shape by changing the cytoskeleton structure and modulate cell proliferation through the regulation of cell cycle-related proteins.

### RhoA activity and stress fibers are required for stiffness-regulated EC proliferation

RhoA is reported to mediate shape-dependent cell growth [27]. To elucidate the role of Rho-GTPase in stiffness-regulated cell proliferation, RhoA activity was measured in ECs on substrates with different stiffnesses using the RBD-pull down assay. ECs on LSG exhibited a significantly lower activity of RhoA than those on HSG (Fig. 2A). To further investigate the involvement of RhoA activity in stiffness-regulated cell growth, the constitutively active form of RhoA (RV14) protein with GST tag was transfected into ECs. RV14 caused increases of cyclin A expression and Rb hyper-phosphorylation on both HSG and LSG and a significant reduction of p27 expression on LSG (Fig. 2B). RV14 caused a decrease of G1-phase cells and an increase of S-phase cells in ECs on LSG but had no significant effect on ECs on HSG. C3 exoenzyme, which inactivates RhoA, caused an increase in G1-phase cells and a decrease in S-phase cells in ECs on HSG but had no significant effect on ECs on LSG (Fig. 2C). In concert with the well-known role of Rho-GTPase in stress fiber regulation [28], we found that EC stress fiber formation was enhanced by RV14 and reduced by C3 exoenzyme (Fig. S3). These results indicate that RhoA activity and the consequent modulation of actin distribution may play an important role in the stiffness-regulation of cell proliferation.

### HSG-induced EC proliferation is mediated through Src/Vav2/RhoA pathway

To assess the mechanisms by which ECs respond to substrate stiffness, we investigated the kinase activities in EC focal adhesion complexes. Src has been reported to phosphorylate the tyrosine-172 of Vav2, a RhoGEF, to modulate Rho-GTPase activities [15,17]. As shown in Fig. 3A, HSG induced higher levels of Src and Vav2 phosphorylations in ECs than LSG. Pretreatment with a Src kinase inhibitor, PP1 (20 μM), inhibited the HSG-induced Src and Vav2 phosphorylations, indicating that Src is the upstream kinase for Vav2 phosphorylation on HSG (Fig. 3B). The knockdown of Vav2 expression by transfecting the Vav2-shRNA plasmid into ECs reduced the RhoA activity in ECs on HSG to the

**Table 1.** Characteristics of polyacrylamide hydrogels.

| Sample Name          | Final Acry% | Final Bis% | Young's modulus (kPa) |
|----------------------|-------------|------------|-----------------------|
| High Stiff-Gel (HSG) | 10          | 0.2        | 21.5±0.06             |
| Low Stiff-Gel (LSG)  | 5           | 0.05       | 1.72±0.20             |

doi:10.1371/journal.pone.0046889.t001

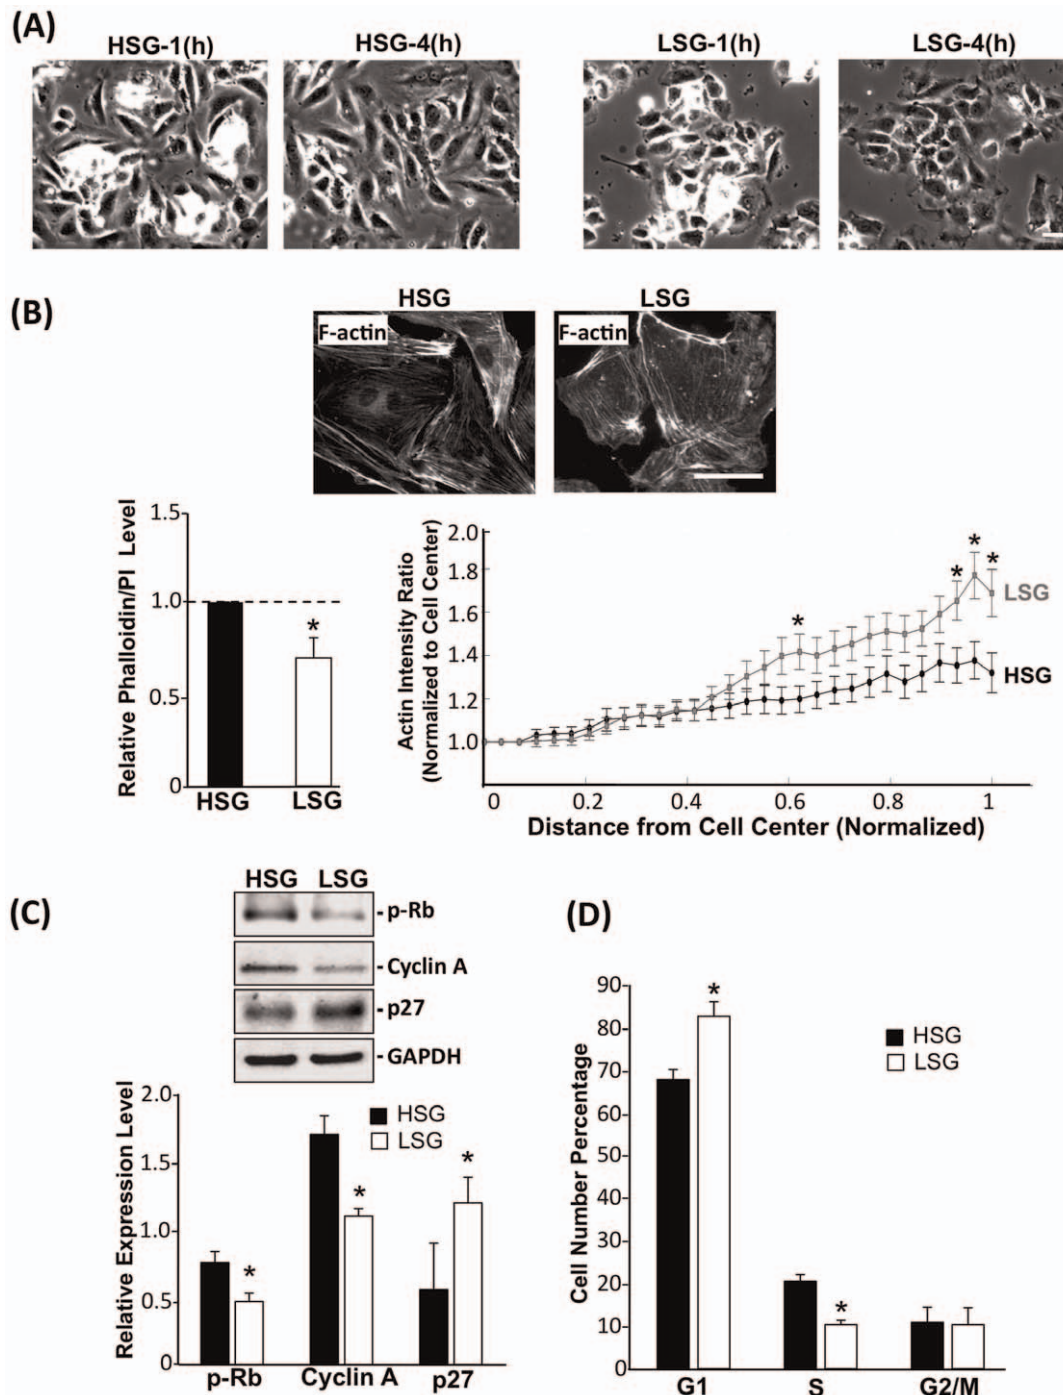

**Figure 1. Substrate stiffness regulates cytoskeletal organization and EC proliferation.** (A) Representative phase images showing the morphology of ECs seeded and allowed to spread on HSG and LSG for the indicated time periods. Scale bar = 50  $\mu$ m. (B) F-actin staining with FITC-labeled phalloidin. The line graph (right lower panel of B) shows the normalized radial distribution of scanned fluorescent intensity from cell nucleus to cell boundary,  $n=24$  cells. \*  $p<0.05$  for comparison between HSG and LSG for each normalized radial position. Bar graph (left panel of B) shows the F-actin fluorescence intensities for HSG and LSG normalized with cell numbers. \*  $p<0.05$  for comparison between HSG and LSG. Scale bar = 50  $\mu$ m. (C) Immunoblotting with antibodies against hyper-phosphorylated Rb, cyclin A, and p27 for ECs lysed after seeded on HSG and LSG for 24 h. Bar graph represents the quantified results of three independent experiments. \*  $p<0.05$  for comparison between HSG and LSG. (D) Cell cycle populations were analyzed by flow cytometry. \*  $p<0.05$  between HSG and LSG ( $n=3$ ). doi:10.1371/journal.pone.0046889.g001

level seen on LSG (Fig. 3C), but had no effect on Src phosphorylation (data not shown). In ECs on HSG, the inhibition of Src (with PP1) and Vav2 (with sh-Vav2) also significantly lowered the cyclin A expression and Rb hyper-phosphorylation

while augmenting p27 expression, in comparison with corresponding controls (Fig. 3D). Src inhibition by using the Src specific-siRNA also had the same effects as PP1 treatment in ECs on HSG (Fig. S4). In addition, the knockdown of Vav2 increased



the G1-phase cells and decreased S-phase cells in ECs on HSG (Fig. 3E). These results indicate that the HSG activates the Src/Vav2 pathway to enhance cell proliferation compared to ECs on LSG.

### SEPT9 mediates the RhoA inhibition and cytoskeleton distribution in ECs on LSG

As shown in Fig. 1B, ECs on LSG exhibited greater cortical actin distribution and a lower RhoA activity than the ECs on HSG. Septin (SEPT) family proteins are highly correlated with cortical actin integrity [21] and RhoA activity inhibition [19]. Actin stress fibers have been shown to colocalize with the SEPT7-SEPT9-SEPT11 polymer complex and are functionally and structurally interdependent [29]. As shown in Fig. 4A, *SEPT9* expression was markedly higher in ECs on LSG in comparison to HSG. The expression of *SEPT7* was slightly lower in ECs on LSG, whereas *SEPT11* expression did not differ significantly between HSG and LSG. To test whether SEPT9 is involved in regulating the differences in morphology and cytoskeletal distribution in ECs on HSG and LSG (Figs. 1A and B), we inhibited SEPT9 expression using the SEPT9-shRNA plasmid. Transfection of the SEPT9-shRNA plasmid resulted in ~40% reduction of *SEPT9* expression level in cells in comparison to the control-shRNA cells (Fig. 4B; left panel). Inhibition of SEPT9 caused ECs to become more elongated and spindle shaped on both LSG and HSG (Fig. 4C). The knockdown of SEPT9 also caused a significant increase in RhoA activity (Fig. 4B; right panel) and a remodeling of actin distribution from the peripheral to the central region in ECs on LSG (Fig. 4D). These results indicate that SEPT9 mediates the stiffness-regulation of RhoA activity and cortical actin distribution.

### SEPT9 regulates RhoA-mediated EC proliferation through p114GEF and the Src/Vav2 pathway

Our results showed that ECs on LSG expressed a higher level of SEPT9 that leads to the inhibition of RhoA (Fig. 4B; right panel). SEPT9 has been shown to function as a RhoA inhibitor by associating with the p114GEF in REF cells [19]. We observed that the SEPT9-associated p114GEF was increased in ECs on LSG compared with ECs on HSG (Fig. 5A) suggesting that the increase in SEPT9 expression on LSG enhances the recruitment of p114GEF into the complex, which in turn reduces the RhoA activation. Our results showed that the Src/Vav2 pathway modulated RhoA activity in ECs on substrates with different stiffnesses (Fig. 3). Inhibition of SEPT9 increased both Src and Vav2 phosphorylations in ECs on LSG (Fig. 5B), suggesting that SEPT9 regulates RhoA activity not only by recruiting p114GEF but also by inhibiting the Src/Vav2 pathway in ECs on LSG. To further investigate the role of SEPT9 in regulating EC functions, we found that the knockdown of SEPT9 significantly increased the levels of cyclin A expression and Rb hyper-phosphorylation and decreased the expression level of p27 in ECs on LSG (Fig. 5C). These changes were accompanied by a decrease in G1-phase cells and an increase in S-phase cells in ECs on LSG (Fig. 5D). The above results indicate that SEPT9 plays a critical role in substrate stiffness-regulation of signaling which leads to morphological and functional consequences.

### Integrin $\alpha_v\beta_3$ mediates stiffness-modulation of *SEPT9* expression and EC proliferation

It has been reported that integrin  $\alpha_v\beta_3$  activates Src family kinases in response to increased matrix-stiffness during tumorigenesis [30] and that cells respond to mechanical tension through

the activation of integrin, Rho-GTPases and Src family kinases [31,32]. To determine the role of integrin  $\alpha_v\beta_3$  in mechanotransduction induced by substrate stiffness, ECs were seeded on HSG and LSG for 24 h, and integrin  $\alpha_v\beta_3$  expression and activation were investigated. Quantification of surface expression of integrins by flow cytometric analyses showed that ECs expressed the same amounts of surface integrin  $\alpha_v\beta_3$  and integrin  $\beta_3$  on HSG and LSG (Fig. 6A). However, the use of a monoclonal antibody LIBS- $\beta_3$  that specifically recognizes the active conformation of integrin  $\beta_3$  showed that ECs expressed higher levels of activated integrins on HSG than on LSG (Fig. 6B). These results indicate that the activation of integrins, rather than its expression level, may play an important role in regulating EC behavior on substrates with different stiffnesses. Blocking integrin  $\alpha_v\beta_3$  with the antibody LM609 significantly increased the *SEPT9* expression (Fig. 6C), inhibited Src/Vav2 phosphorylations (Fig. S5), and increased G1-phase cells while decreasing S-phase cells on HSG, as compared with control IgG-treatment (Fig. 6D). These results demonstrate that integrin  $\alpha_v\beta_3$  plays a critical role in the regulation of *SEPT9* expression that leads to the stiffness-modulation of cell cycle progression.

## Discussion

In the vascular system, it is believed that the stiffening of the extracellular environment caused by vessel injury promotes cell proliferation and contributes to neointima formation. Studies on *in vivo* mouse vessels have shown that the stiffness is ~1 kPa for uninjured sites and ~10 kPa for injured sites - the latter being comparable to the Young's modulus reported for atherosclerotic lesions [24,25]. Study by Stroka et al. suggests that the range of normal EC substrate stiffness is around 1–4 kPa; the diseased EC substrate stiffness is expected to be greater than 5 kPa and can be up to 280 kPa, which leads to an increase of neutrophil transmigration [5]. EC proliferation rates on glass (>60 GPa), substrates with high-stiffness (21.5 kPa), medium stiffness (9.7 kPa) and lowest stiffness substrates (1.72 kPa) decreased as stiffness decreases (Fig. S1). However, the statistic analyses demonstrated no significant difference between the ECs on glass and substrate of 21.5 kPa, suggesting that 21.5 kPa may have reached the plateau for substrate stiffness-mediated EC proliferation. The 21.5 kPa (HSG) and 1.72 kPa (LSG) substrates (representing the substrate in the range of normal and pathological conditions, respectively) were chosen for the mechanistic studies for the significant differences in their capability in regulating cell function. Our present study has demonstrated that 1) HSG modulates EC proliferation through the activation of integrins/Src/Vav2/RhoA pathway, and 2) LSG inhibits EC proliferation through the inactivation of integrins, leading to an increase of *SEPT9* that attenuates the Src/Vav2/RhoA pathway.

Previous studies have demonstrated that cancer cells and fibroblasts spread well on stiffer substrates with centrally distributed stress fibers and correlate with high proliferation and migration rates [33,34]. In contrast to stiffer substrates, these cells, when seeded on softer substrates, have lower cellular rigidity and greater cortical actin cytoskeleton distribution [34]. In concert with these findings, our present study showed that ECs on HSG spread well with a central actin stress fiber distribution, whereas ECs on LSG were polygonal in shape with a cortical distribution of actin (Figs. 1A and B). Cell spreading controls many cellular functions through the regulation of RhoA activity [35], and our results also demonstrated that ECs on LSG had lower RhoA activity (Fig. 2A) accompanied by a loss of central actin and an increase of cortical actin distributions. Inhibition of RhoA activity

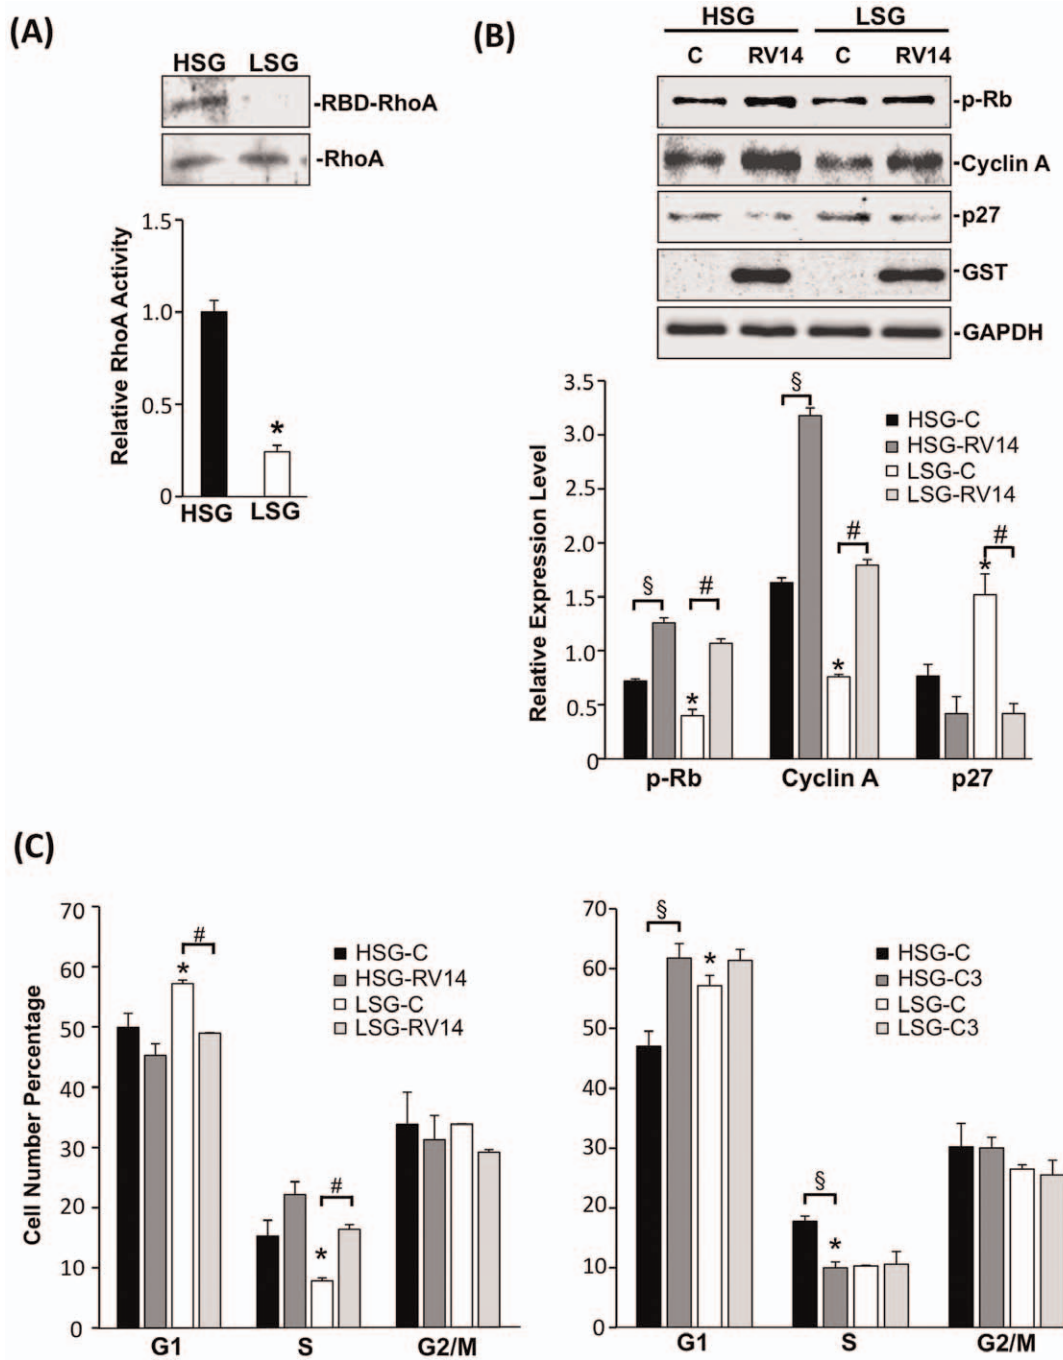

**Figure 2. RhoA mediates the substrate stiffness-regulation of EC proliferation.** (A) ECs were seeded on HSG and LSG for 24 h and cell lysates were subjected to RBD pull down assay. Immunoblotting of active RhoA (RBD-RhoA) and total RhoA was performed by using an antibody against RhoA. \*  $p < 0.05$  for comparison between HSG and LSG ( $n = 3$ ). (B) ECs were transfected with empty vector or GST-tagged RhoV14 (RV14). 24 h post-transfection, cells were seeded on HSG and LSG for another 24 h. Immunoblotting of cell cycle regulatory proteins was performed by using antibodies against hyper-phosphorylated Rb, cyclin A, and p27. \*  $p < 0.05$  in comparison with the corresponding controls on HSG and LSG. §  $p < 0.05$  for comparison between control and RV14 on HSG. #  $p < 0.05$  for comparison between control and RV14 on LSG ( $n = 3$ ). (C) Cells were transfected with the empty vector or RV14 (left panel of C) and empty vector or C3 (right panel of C). Bar graphs of flow cytometry analyses show the percentages of cells in G0/G1, S, and G2/M phases of ECs on HSG and LSG. \*  $p < 0.05$  in comparison with the corresponding controls on HSG and LSG. #  $p < 0.05$  for comparison between the control and RV14 on LSG. §  $p < 0.05$  for comparison between the control and C3 on HSG ( $n = 3$ ). doi:10.1371/journal.pone.0046889.g002

in cells caused the reduction of cell spreading and induction of p27 expression, which led to an attenuation of cell cycle progression [27]. The p27, as a CDK inhibitor, directly inhibits the cyclin-CDK activity to cause the hypophosphorylation of Rb which leads

to the down-regulation of cyclin A expression, and consequential growth arrest [36]. Our results also showed that blunted RhoA activity in ECs on LSG led to a decrease of cyclin A, the hypophosphorylation of Rb, an increase of p27, and consequent

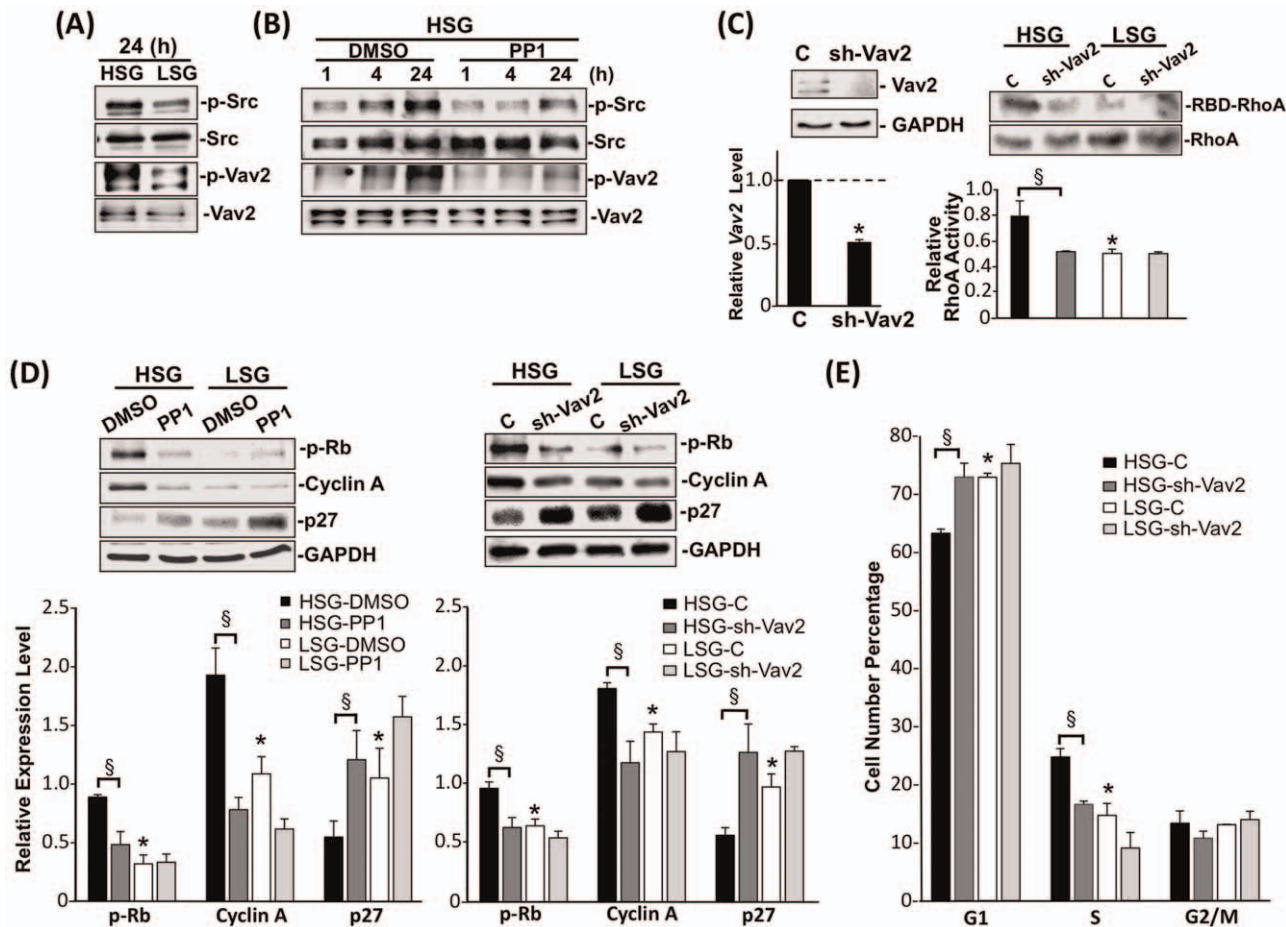

**Figure 3. HSG modulates EC proliferation through the Src/Vav2 pathway.** (A) ECs were seeded on HSG and LSG for 24 h, and cell lysates were immunoblotted with antibodies against phospho-Src (Y416), Src, phospho-Vav2 (Y172), and Vav2. (B) ECs pretreated with DMSO and PP1 (20  $\mu$ M) for 1 h were seeded on HSG for 1 h, 4 h or 24 h. Cell lysates were analyzed for phospho-Src (Y416), Src, phospho-Vav2 (Y172), and Vav2. (C) Vav2 was knocked down in ECs by shRNA (sh-Vav2) with more than 50% reduction in Vav2 RNA and protein levels (left lower and upper panels, respectively). Cells with sh-Vav2 and control-shRNA were seeded on HSG and LSG for 24 h, and cell lysates were subjected to an RBD-pull down assay with an antibody against RhoA (right panel). (D–E) ECs were pretreated with PP1 or transfected with Vav2-shRNA (sh-Vav2), seeded on HSG and LSG for 24 h, and subjected to immunoblotting for protein expression (D) or flow cytometry for cell cycle analyses (E). \*  $p < 0.05$  in comparison with the corresponding controls on HSG and LSG. §  $p < 0.05$  for comparison between DMSO and PP1 or between control and sh-Vav2 on HSG ( $n = 3$ ). doi:10.1371/journal.pone.0046889.g003

inhibition of EC proliferation. ECs seeded on HSG exhibited opposite results (Figs. 1C and D). Overexpression of the active form of RhoA (RV14) reversed the LSG effects, indicating that RhoA is indeed involved in cell cycle progression in ECs on different substrate stiffness.

In addition to RhoA, the Rho-GTPase family protein Rac has also been reported to regulate the stiffness-mediated cell cycle progression in vascular smooth muscle cells and mouse embryonic fibroblasts through the modulation of cyclin D1 expression [24]. Our results on ECs, however, showed no difference in the expression of cyclin D1 between HSG and LSG; furthermore, overexpression of the active (RacV12) or negative (RacN17) form of Rac had no significant effect on the stiffness-modulated expressions of cell cycle regulatory proteins (Fig. S6). These results suggest that Rac may not be critical for regulating the proliferation of ECs on substrates with different stiffnesses.

Src family kinases have been reported to play important roles in regulating cell functions in response to changes of substrate stiffness [30,37]. Src has also been shown to be an important molecule that provides the link between integrins and Rho-GTPase signaling pathways through the Vav2 pathway [17]. We

found that in comparison to ECs on LSG, ECs on HSG exhibited higher Src activation, which in turn, led to Vav2 phosphorylation at Y172 (Figs. 3A and B). The knockdown of Vav2 expression and treatment with PP1 or Src specific-siRNA to inhibit Src activation or expression, respectively, inhibited RhoA activity, cyclin A expression, Rb hyper-phosphorylation and induced p27 expression in ECs on HSG, thus leading to the consequential EC growth arrest on HSG (Figs 3C, D, E and Fig. S4). These results demonstrate that the stiff substrate can increase EC proliferation via the Src/Vav2/RhoA pathway.

Septins are members of the conserved family of cytoskeletal GTPase proteins and are classified into four groups based on their amino acid similarity [38]. Septins have the intrinsic ability to assemble into polymers and regulate cytoskeleton and membrane organization in mammalian cells [39]. Our results showed a marked induction of *SEPT9* expression in cells on LSG in comparison with the ECs on HSG (Fig. 4A) suggesting that *SEPT9* may function as an important regulator for actin organization and RhoA activity in ECs on LSG. Here, we report that *SEPT9* gene and protein expressions in ECs on different substrate stiffnesses (Figs. 4A and 5A) were correlated with cortical actin formation



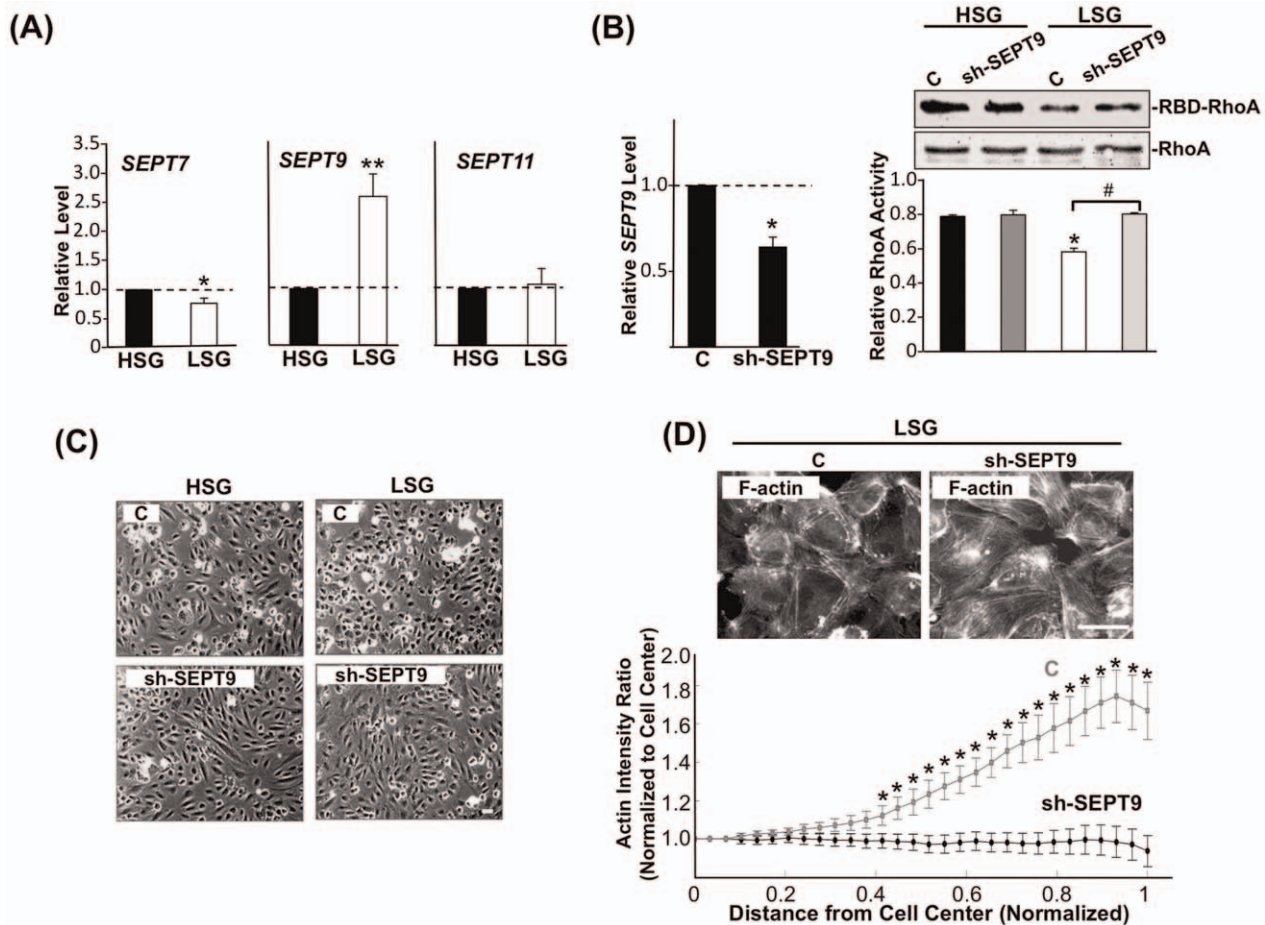

**Figure 4. LSG-induced *SEPT9* expression inhibits RhoA activity and peripheral actin distribution.** (A) Gene expression profiles for *SEPT7*, *SEPT9*, and *SEPT11* in ECs cultured on LSG and HSG for 24 h. Data represent mean  $\pm$  SEM (Student's t-test; \*  $p < 0.05$ , \*\*  $p < 0.01$ ). (B) Gene expression profile of *SEPT9* after transfection with sh-SEPT9 (left panel). RhoA activity level after transfection with sh-SEPT9 was followed by RBD-pull down assay (right panel). \*  $p < 0.05$  in comparison with the corresponding controls on HSG and LSG. #  $p < 0.05$  for comparison between control and sh-SEPT9 on LSG. (n = 3). (C) Phase microscopy images of ECs seeded on HSG or LSG for 24 h in response to sh-SEPT9 transfection. Scale bar = 50  $\mu$ m. (D) ECs with control and sh-SEPT9 transfection were seeded on LSG for 3 h. Actin was stained with FITC-phalloidin and the cellular distribution was quantified by image analysis using the intensity ratio profile program (Fig. S1). \*  $p < 0.05$  for comparison between control and sh-SEPT9 at successive normalized radial positions from the cell center (0) to the periphery (1). n = 17 cells. Scale bar = 50  $\mu$ m. doi:10.1371/journal.pone.0046889.g004

(Figs. 1A and 1B). The higher *SEPT9* expression in ECs on LSG corresponded to a greater cortical actin distribution than that seen in ECs on HSG (Fig. 1D). The knockdown of *SEPT9* in ECs on LSG led to the remodeling of peripheral cortical actin to form central actin fibers (Fig. 4D, upper panels). This observation is quantitatively supported by the intensity plot of the radial distribution of actin (Fig. 4D, lower panel), which shows an extensive loss of the peripheral cortical layer of actin. These results reveal an important role of *SEPT9* in the substrate stiffness-modulation of ECs in cortical actin formation. Our results also showed that the knockdown of *SEPT9* reversed the down-regulation of RhoA activity on LSG (Fig. 4B). This reversal occurred most likely through the recruitment of p114GEF to directly inhibit RhoA activity (Fig. 5A), as well as through the depressive effect on the Src/Vav2 phosphorylations seen in ECs seeded on LSG (Fig. 5B). Src has been reported to regulate Rho activity through activation of GEF and GAP [16]. During initial cell spreading (10–30 mins), Src enhances p190RhoGAP phosphorylation, leading to a down-regulation of Rho activity, whereas at a later spreading stage (40–90 mins), Src increases Rho activity through GEF and promotes actin stress fiber formation [40,41].

Our results demonstrated that inhibition of *SEPT9* expression caused the increase of Src/Vav2 phosphorylations in ECs on LSG (Fig. 5B), suggesting that *SEPT9* regulates Src activation and thus exerts an influence on p190GAP. However, the detail role of *SEPT9* in modulating Src/p190GAP signaling remains unclear. In addition, when seeded on LSG, ECs transfected with *SEPT9*-shRNA showed a significant increase in cell proliferation (Figs. 5C and 5D). These findings establish for the first time that *SEPT9* acts in a novel role as a regulator responding to substrate stiffness to inhibit RhoA activity on LSG not only by associating with p114GEF but also by inhibiting the Src/Vav2 pathway to attenuate cell cycle progression.

Integrins are important in sensing mechanical cues to regulate cell signaling and functions. ECs express two major fibronectin (FN) receptors: integrin  $\alpha_v\beta_3$  and integrin  $\alpha_5\beta_1$ . These two types of integrins are linked to different mechanical functions in the cell. Studies with FN-coated beads have shown that integrin  $\alpha_5\beta_1$  provides a strong adhesive bond that correlates with high force resistance. In contrast, integrin  $\alpha_v\beta_3$  forms unstable bonds with FN that are easily broken by low forces [42]. This force-sensitive integrin  $\alpha_v\beta_3$ , instead of the force-resistant integrin  $\alpha_5\beta_1$ , may

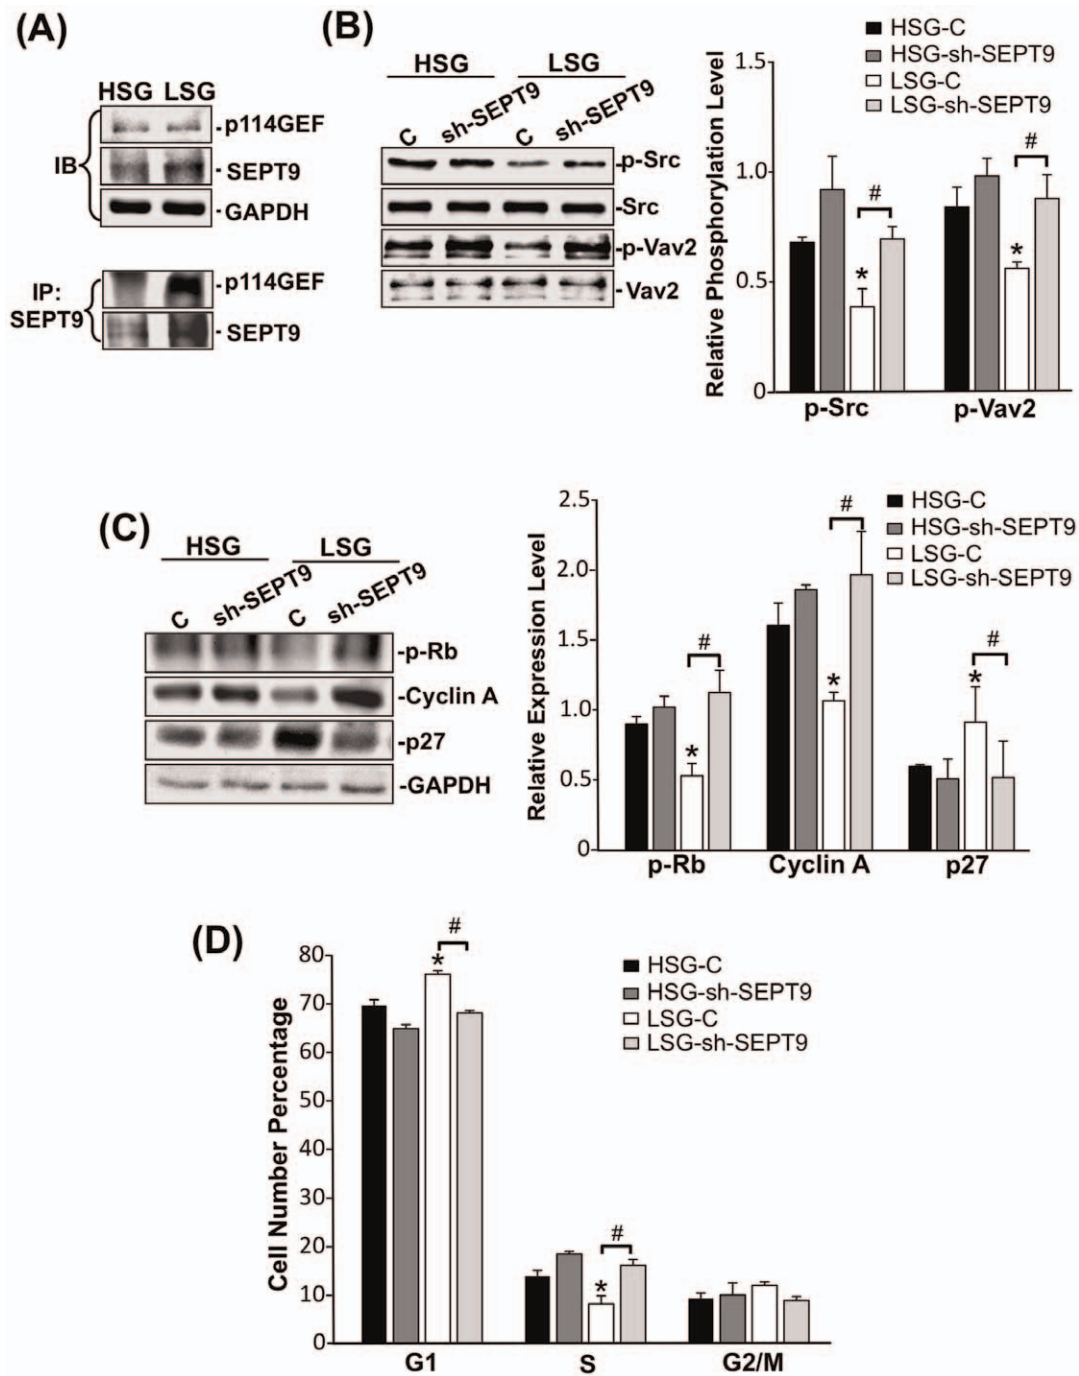

**Figure 5. SEPT9 regulates p114GEF and Src/Vav2/RhoA pathway to modulate EC proliferation.** ECs were seeded on HSG and LSG for 24 h. (A) The total cell lysates were immunoblotted with antibodies against p114GEF and SEPT9 (upper panel) and immunoprecipitated with an antibody against SEPT9 followed by immunoblotting with antibodies against p114GEF and SEPT9 (lower panel). (B–C) ECs transfected with control-shRNA or sh-SEPT9 were seeded on HSG and LSG for 24 h, and the cell lysates were immunoblotted with antibodies against phospho-Src (Y416), Src, phospho-Vav2 (Y172), and Vav2 (B) and hyper-phosphorylated Rb, cyclin A, and p27 (C). Bar graph represents the quantified results of three independent experiments. (D) ECs transfected with control-shRNA or sh-SEPT9 were subjected to flow cytometry for cell cycle analyses. \*  $p < 0.05$  in comparison with the corresponding controls on HSG and LSG. #  $p < 0.05$  for comparison between control and sh-SEPT9 on LSG ( $n = 3$ ). doi:10.1371/journal.pone.0046889.g005

better serve as a sensor for mechanotransduction [43]. In fibroblasts, integrin  $\alpha_v\beta_3$ , but not integrin  $\beta_1$ , mediates the recruitment and activation of Fyn in response to increased matrix stiffness [30]. In addition, integrins  $\beta_1$  and  $\beta_3$  may play differential roles in modulating RhoA activation. Overexpression of integrin

$\beta_3$ , but not integrin  $\beta_1$  results in an increase in RhoA-GTP levels in cells cultured on FN-coated substrate [44]. Our results demonstrated substrate stiffness-mediated EC proliferation via RhoA signaling pathway. We tested the effects of integrins  $\alpha_v\beta_3$ , and  $\beta_1$  blocking in ECs on stiffness-mediated RhoA activity. Our



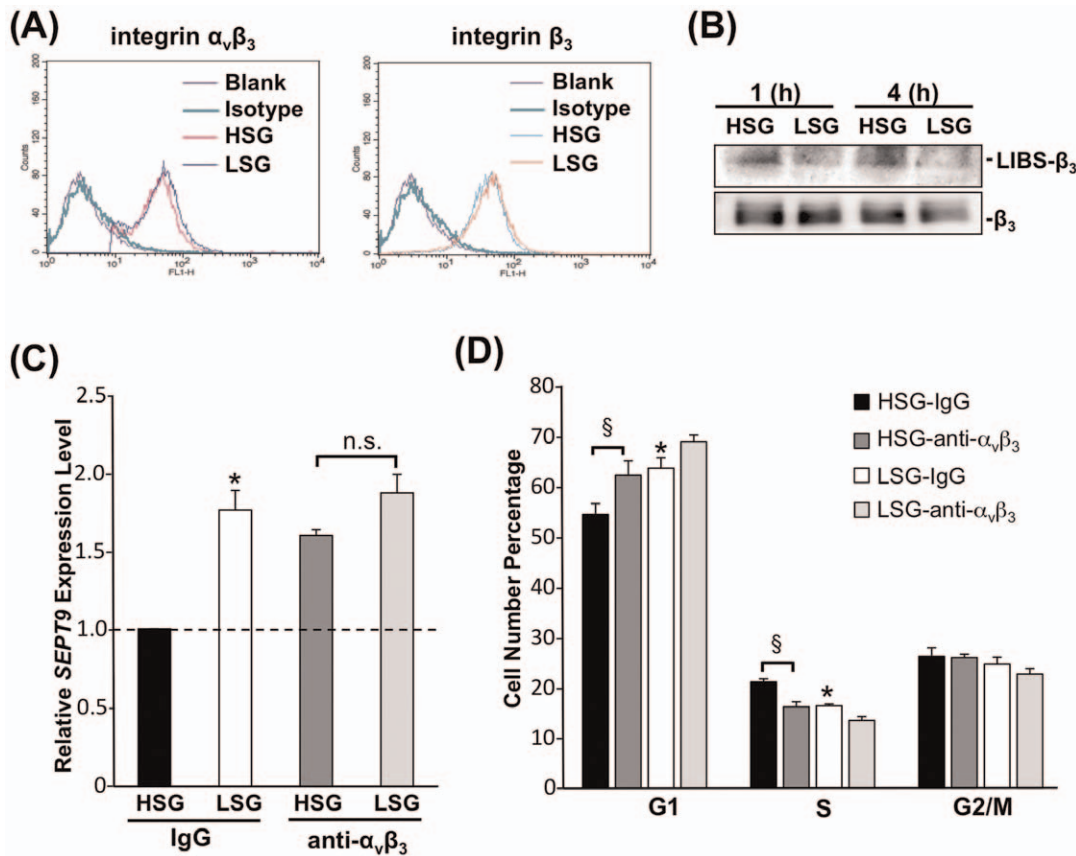

**Figure 6. Integrin  $\alpha_v\beta_3$  mediates the stiffness-modulation of *SEPT9* expression and EC proliferation.** (A) Integrin expression profiles of ECs on HSG and LSG. ECs on HSG and LSG for 24 h were stained with integrin antibodies against integrin  $\alpha_v\beta_3$  and integrin  $\beta_3$  and analyzed by flow cytometry. The green-line histogram represents the isotype control. The red- and blue-line histograms represent the surface expressions of the specific integrins on HSG and LSG, respectively. (B) ECs were seeded on HSG and LSG for the indicated times and cell lysates were immunoblotted with antibodies against the LIBS- $\beta_3$  domain (ligand-induced binding site), and  $\beta_3$  (total integrin  $\beta_3$ ). (C–D) ECs were pretreated with integrin  $\alpha_v\beta_3$  blocking antibody (10  $\mu$ g/mL) or IgG for 2 h prior to be seeded on HSG and LSG for 24 h followed by qPCR assays for *SEPT9* expression (C) and cell cycle analyses by flow cytometry (D). \*  $p < 0.05$  in comparison with the corresponding IgG controls on HSG and LSG. §  $p < 0.05$  for comparison between IgG control and integrin  $\alpha_v\beta_3$  blocking antibody treatment on HSG. n.s. indicates no significant difference. (n = 5 for *SEPT9* expression and n = 3 for cell cycle analyses). doi:10.1371/journal.pone.0046889.g006

results showed that blocking integrin  $\alpha_v\beta_3$  inhibited the HSG-mediated RhoA activation (Fig. S7A). In contrast, blocking integrin  $\beta_1$  resulted in no significant change (Fig. S7B). Integrin activation can be controlled by substrate stiffness in many cell types [32,45,46]. Moreover, Peng et al. have developed a mathematical model to demonstrate that soft substrates (<2 kPa) produce higher energy barriers for integrin activation and clustering; in contrast, substrates with stiffness ranging from 10 to 100 kPa cause integrin-focal adhesion growth and shorten the time required for firm adhesion [47]. Recent studies on tumors have shown that the ligated/active integrin and unligated/inactive integrin exert opposite actions in regulating cellular functions: the ligated integrin promotes cell proliferation, whereas the unligated integrin inhibits cell proliferation through the transmission of apoptosis signals [48,49]. Treatment with an integrin  $\alpha_v\beta_3$  antagonist (mimicking the unligated status) inhibited angiogenic vascular cells proliferation in tumor models [50]. In the present study, we observed that while the surface expression levels of integrin  $\alpha_v\beta_3$  and  $\beta_3$  on HSG and LSG were similar (Fig. 6A), the activation level of integrin  $\alpha_v\beta_3$  was higher on HSG than that on LSG. Moreover, the integrin  $\alpha_v\beta_3$  antagonist significantly induced the *SEPT9* expression in ECs on HSG (Fig. 6C), suggesting the

role of integrin  $\alpha_v\beta_3$  in the differential regulation of *SEPT9*-mediated EC growth on HSG and LSG.

In summary, our study has established a molecular mechanism by which ECs respond to the alterations of ECM mechanics to regulate their proliferation (Fig. 7). Substrates with high stiffness causes the activation of integrin  $\alpha_v\beta_3$  to inhibit *SEPT9* expression, leading to a central distribution of actin stress fibers, activation of the Src/Vav2/RhoA signaling pathway, and hence EC cell cycle progression. In contrast, substrates with low stiffness causes the inactivation of integrin  $\alpha_v\beta_3$  to increase *SEPT9* expression which induces the peripheral distribution of actin, inhibition of the Src/Vav2/RhoA signaling pathway, and hence repression of EC proliferation. Our findings provide new insights into the mechanism by which ECM mechanics regulate EC proliferation.

## Materials and Methods

### Cell Culture

The Human Umbilical Vein Endothelial Cells (HUVECs) used in this study were isolated from human umbilical cords as previously described [51] and the procedure followed the approved UCSD IRB protocol. HUVECs were cultured in M199 medium (Gibco, Grand Island, NY), supplemented with

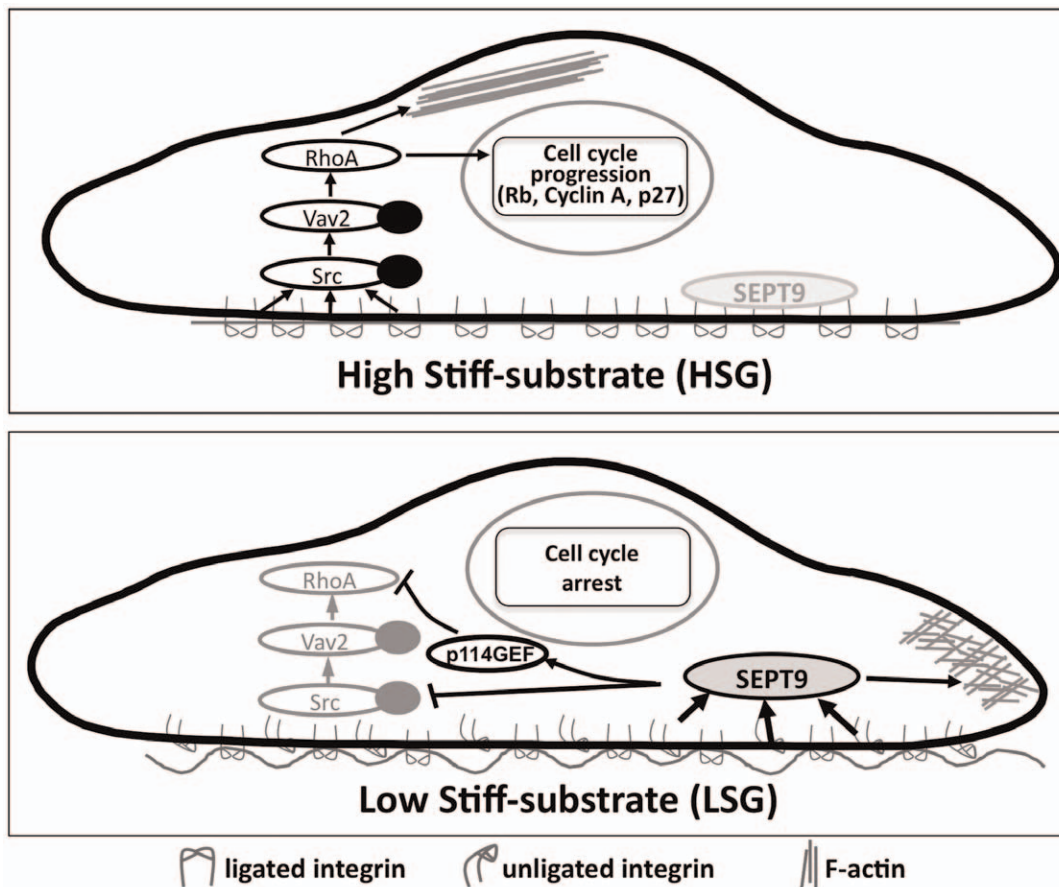

**Figure 7. Schematic summary of the mechanisms by which stiffness modulates EC cytoskeleton organization and cell cycle progression.**

doi:10.1371/journal.pone.0046889.g007

10% fetal bovine serum (Gibco), 10% ECGM (Cell Applications, San Diego, CA), 2 mM L-glutamine (Gibco), 1 mM sodium pyruvate, 1% penicillin/streptomycin (Gibco) and maintained in a humidified 5% CO<sub>2</sub>-95% air incubator at 37°C.

### Polyacrylamide Gel Preparation

Gel solutions were prepared by using acrylamide (40% w/v solution, BioRad, Hercules, CA), bis-acrylamide crosslinker (2% w/v solution, Bio-Rad), and 1% HEPES (pH 8.5, EMD Biosciences, San Diego, CA). To prepare gels with different levels of stiffness, mixtures were prepared to contain 5–10% acrylamide and 0.05–0.2% bis-acrylamide and degassed for 20 min to remove oxygen from the solutions. To initiate polymerization, 0.02% APS and 20 µL TEMED were added. A 50–70 µm-thick gel was cast, and the thickness was confirmed through imaging of embedded fluorescent beads in the gel using an Olympus confocal microscope. The results on substrate stiffness determined by atomic force microscopy are shown in Table 1.

Polyacrylamide gels were functionalized to permit cell adhesion by covalently linking the specific ECM ligand (fibronectin) to gel surfaces as previously described [52]. In brief, the gels were activated by exposing the heterobifunctional crosslinker Sulfo-SANPAH (Pierce, Rockford, IL; 0.5 mg/mL in 1×PBS) to UV light. After activation, the gels were washed with 1×PBS to remove excess crosslinker. Gels were then coated with 0.1 mg/mL fibronectin (Sigma, St. Louis, MO) overnight at 4°C or 4 h at room temperature.

### Materials

Rabbit polyclonal antibodies (pAbs) against cyclin A, cyclin D1, p27, phospho-Src and Vav2 were purchased from Santa Cruz Biotechnology (Santa Cruz, CA). Rabbit pAb against hyperphosphorylated-Rb was purchased from Cell Signaling Technology (Beverly, MA). Mouse mAbs against human  $\alpha_v\beta_3$ ,  $\beta_3$  and  $\beta_1$  and LIBS- $\beta_3$  integrins were purchased from Chemicon (Temecula, CA). The control shRNA and specific shRNA of Vav2 were purchased from Santa Cruz Biotechnology. The shRNA of SEPT9 was a kind gift from Dr. K.L. Guan (Department of Pharmacology and Moores Cancer Center, University of California, San Diego). Other chemicals of reagent grade were obtained from Sigma (St. Louis, MO), unless otherwise noted.

### Primer Design

*SEPT7* (sense: 5'-AAGCAAAGCTGGGAAGCTCAA-3'; anti-sense: 5'-TCAAACGGATCCAACAAACA-3'; product length, 170 bp)

*SEPT9* (sense: 5'-CCAAGTGACCAGGGAAGTGT-3'; anti-sense: 5'-AAGGCACGGGTAGATCAACAG-3'; product length, 213 bp).

*SEPT11* (sense: 5'-GAGAAAGCAAATGGGATGGA-3'; anti-sense: 5'-CACACCTGGCCTGGATTAGT-3'; product length, 202 bp).

### Immunofluorescence Microscopy

Cells were fixed with 2% paraformaldehyde in PBS for 10 min and treated with 1% BSA for 1 h at room temperature. Cells were then treated with FITC-phalloidin for visualizing F-actin and PI for nuclear staining.

### Flow Cytometric Analysis

The harvested cells were fixed for 30 min in cold ethanol (70%), washed, permeabilized with 0.1% Triton X-100 in PBS, stained with 50 mg/mL PI (Invitrogen, Grand Island, NY) and then treated with 1 mg/mL RNase A for 30 min. Stained cells were analyzed with a fluorescence-activated cell sorter (FACS) Calibur (Becton-Dickinson, Franklin Lakes, NJ), and the data were analyzed by using the Flow-Jo cell cycle analysis program. For determination of surface integrin expression, cells were stained with integrin  $\beta_3$ , integrin  $\alpha_v\beta_3$ , and isotype antibodies, and analyzed using the FACS Calibur flow cytometer.

### RNA Isolation and Quantitative qPCR

The total RNA was isolated by using the Trizol reagent and manufacturer protocol. Reverse transcription was carried out with the uses of 2  $\mu$ g of total RNA and the SuperScript II reverse transcriptase (Invitrogen). The cDNA was amplified through PCR on a 7900HT real-time PCR machine (Applied Biosystems, Foster City, CA) according to manufacturer's protocol. PCR was performed with 0.5 mM primers of Septin genes (i.e., *SEPT7*, *SEPT9* and *SEPT11*) or *Vav2*. Three biological replicates were used for analysis, and all reactions were run in triplicates. The relative levels of gene expressions in ECs were determined using the  $\Delta\Delta C_T$  method and compared with internal controls.

### Immunoblotting Analysis

The cells were lysed with a buffer containing 1% Nonidet P-40, 0.5% sodium deoxycholate, 0.1% SDS, and a protease inhibitor mixture (PMSF, aprotinin, and sodium orthovanadate). The total cell lysate was separated by SDS/PAGE (12% running, 4% stacking) and non-reducing PAGE for LIBS- $\beta_3$  antibody and transferred onto a nitrocellulose membrane (Immobilon P, 0.45- $\mu$ m pore size). The membrane was then incubated with the designated antibodies. Immunodetection was performed using the Western-Light chemiluminescent detection system (Applied Biosystems).

### Preparation of Recombinant Proteins

The constitutively active forms of RhoA (RV14) and Rac (RacV12) and the constitutively negative form of Rac (RacN17) were expressed and purified from *Escherichia coli* expression plasmid pGEX4T-1. The GST-tagged RV14, RacV12 and RacN17 were purified from *E. coli* as previously described. The Histidine-tagged C3 exoenzyme was purchased from Cytoskeleton, Inc. (Denver, CO).

### siRNA Delivery Assays

The delivery of the SEPT9-shRNA plasmid was carried out by electroporation using a Nucleofector device (Amaxa, Lonza, Switzerland). In brief, cells were resuspended in 100  $\mu$ l of Nucleofector solution (solution III, Nucleofector kit; Amaxa) together with 5  $\mu$ g of shRNA plasmid. The cell-plasmid mixture was electroporated using the A034 program on the device. Immediately after electroporation, 400  $\mu$ l of prewarmed M-199 containing 10% FBS was added and the cells were transferred into culture plates containing 10 ml prewarmed M-199 with 10% FBS. The lentiviral Vav2-shRNA was purchased from Santa Cruz

Biotech (Santa Cruz, CA). Virus infection was carried out by direct overlay on cells with polybrene (5  $\mu$ g/ml) following the manufacturer's protocol. Cells were recovered in growth condition for 24 h prior to usage for experiments.

### Immunoprecipitation

The cells were lysed with a buffer containing 25 mM Hepes (pH 7.4), 1% Triton X-100, 1% deoxycholate, 0.1% SDS, 0.125 M NaCl, 5 mM EDTA, 50 mM NaF, 1 mM  $\text{Na}_3\text{VO}_4$ , 1 mM PMSF, 10 mg/mL leupeptin, and 2 mM BGP. The cells were disrupted on ice by repeated aspirations through a 21-gauge needle. The same amount of protein from each sample was incubated with a designated antibody for 2 h at 4°C with gentle shaking. The immune complex was then incubated with protein A/G plus agarose for 1 h and collected by centrifugation. The agarose-bound immunoprecipitates were washed and incubated with boiling sample buffer containing 62 mM Tris-HCl (pH 6.7), 1.25% (w/v) SDS, 10% (v/v) glycerol, 3.75% (v/v) mercaptoethanol, and 0.05% (w/v) bromophenol blue. The samples were then subjected to SDS/PAGE and immunoblotting analyses.

### Treatment with mAbs

To block specific integrin-fibronectin interactions, the cells were pre-incubated with an antibody against integrins  $\alpha_v\beta_3$  and  $\beta_1$  (10  $\mu$ g/mL) for 2 h before seeding onto the polyacrylamide gels precoated with fibronectin.

### Statistical analysis

Results are expressed as mean  $\pm$  SEM. Statistical analysis was performed by using an independent Student t-test for two groups of data and analysis of variance (ANOVA) followed by Scheffé's test for multiple comparisons. A *p* value less than 0.05 was considered statistically significant.

### Supporting Information

**Figure S1 EC proliferation is modulated by stiffnesses of hydrogels in a graded manner.** (A) Young's moduli of hydrogels. The Young's modulus of the hydrogels with differential composition of acrylamide and Bis were measured by AFM (*N* = 3). (B) Flow cytometric cell cycle analysis of cells in active DNA synthesizing S phase. This bar graph demonstrated the results of cells in S phase from the BrdU incorporation assay. EC cell cycle analysis derived from flow cytometry data. Cells seeded on glass show the highest percentage of cells in S-phase, while the lowest percentage is present in cells seeded on the softest hydrogel, 1.72 kPa. \* *P* < 0.05 when compared to hydrogel 5/0.05. # *P* < 0.05 when compared to glass. Error bars represent SEM. (PDF)

**Figure S2 Method to measure intensity ratio profile.** F-actin intensities of cells were measured from center to edge of cells. Such radial scans were made for each cell from 0° to 360° for every 10°. Intensities were measured along each radial scan line at 30 points equally distributed between cell center and cell edge (dotted line for the 50° example). All intensity values were normalized to that in the center region (blue region in the schematic with an area = 1% of the cell), which was designated as 1. The minimum intensity value of the F-actin image for the whole cell was subtracted as a background from the measured intensity values before calculation. Cell edges were determined manually from the F-actin staining images. (PDF)



**Figure S3 RhoA activation contributes to stress fiber formation.** ECs were transfected for 24 h with control or GST-tagged RhoV14 (RV14) or C3 exozyme and then seeded on HSG and LSG for another 24 h. F-actin was stained with FITC-labeled phalloidin. Bar graph showing the F-actin fluorescence intensity values normalized by the cell number in the same microscopic field. (A) RV14 enhanced the F-actin staining on both HSG and LSG, whereas (B) C3 abolished the central F-actin fiber formation on HSG. \*  $p < 0.05$  in comparison with corresponding for comparison controls on HSG and LSG. §  $p < 0.05$  for comparison between control and RV14 on HSG. #  $p < 0.05$  between control and RV14 on LSG. (n = 3). Scale Bar = 50  $\mu$ m. (PDF)

**Figure S4 Src modulates stiffness-regulated expressions of cell cycle-related proteins.** ECs were transfected with control siRNA (siC, 25 nM) and Src-specific siRNA (siSrc, 25 nM) for 24 h and then were seeded on HSG and LSG for another 24 h. Immunoblotting analyses of cell cycle regulatory proteins were determined by antibodies against hyperphosphorylated Rb, cyclin A, and p27. (PDF)

**Figure S5 Integrin  $\alpha_v\beta_3$  blocking leads to the attenuation of Src and Vav2 phosphorylations.** ECs were pretreated with integrin  $\alpha_v\beta_3$  blocking antibody (10  $\mu$ g/ml) or IgG for 2 h prior to be seeded on HSG and LSG for 4 h. Cell lysates were subjected to immunoblotting analyses with antibodies against phospho-Src (Y416), Src, phospho-Vav2 (Y172), and Vav2. (PDF)

**Figure S6 Rac does not affect stiffness-regulated expressions of cell cycle-related proteins.** ECs were transfected with empty vector, GST-tagged active form of Rac (RacV12), and negative form of Rac (RacN17). After transfection for 24 h, cells were seeded on HSG and LSG for 24 h. Immunoblotting analyses of cell cycle regulatory proteins were determined by antibodies against hyperphosphorylated Rb, cyclin A, cyclin D1, and p27. (PDF)

**Figure S7 Integrin  $\alpha_v\beta_3$ , but not integrin  $\beta_1$  involves in HSG-mediated RhoA activation.** ECs were pretreated with integrins  $\alpha_v\beta_3$  and  $\beta_1$  blocking antibodies (10  $\mu$ g/ml) or IgG for 2 h prior to be seeded on HSG and LSG for 4 h. Cell lysates were subjected to an RBD-pull down assay and detected with an antibody against RhoA. (PDF)

## Acknowledgments

We thank Phu Nyugen for assisting in the general lab work, Leona Flores for advising on data analyses, and Gerard Norwich for help with microscopy.

## Author Contributions

Conceived and designed the experiments: YTY JC YSL SC. Performed the experiments: YTY SSH JC KCW. Analyzed the data: YTY SSH KCW. Contributed reagents/materials/analysis tools: JC SSH JJC. Wrote the paper: YTY JJC YSL SC.

## References

- Atabek ME, Kurtoglu S, Pirgon O, Baykara M (2006) Arterial wall thickening and stiffening in children and adolescents with type 1 diabetes. *Diabetes Res Clin Pract* 74: 33–40.
- Liao D, Arnett DK, Tyroler HA, Riley WA, Chambless LE, et al. (1999) Arterial stiffness and the development of hypertension. The ARIC study. *Hypertension* 34: 201–206.
- Zieman SJ, Melenovsky V, Kass DA (2005) Mechanisms, pathophysiology, and therapy of arterial stiffness. *Arterioscler Thromb Vasc Biol* 25: 932–943.
- Lopez JL, Kang I, You WK, McDonald DM, Weaver VM (2011) In situ force mapping of mammary gland transformation. *Integr Biol (Camb)* 3: 910–921.
- Stroka KM, Aranda-Espinoza H (2011) Endothelial cell substrate stiffness influences neutrophil transmigration via myosin light chain kinase-dependent cell contraction. *Blood* 118: 1632–1640.
- Huynh J, Nishimura N, Rana K, Peloquin JM, Califano JP, et al. (2011) Age-related intimal stiffening enhances endothelial permeability and leukocyte transmigration. *Sci Transl Med* 3: 112ra122.
- Vernon RB, Angello JC, Iruela-Arispe ML, Lane TF, Sage EH (1992) Reorganization of basement membrane matrices by cellular traction promotes the formation of cellular networks in vitro. *Lab Invest* 66: 536–547.
- Yeung T, Georges PC, Flanagan LA, Marg B, Ortiz M, et al. (2005) Effects of substrate stiffness on cell morphology, cytoskeletal structure, and adhesion. *Cell Motil Cytoskeleton* 60: 24–34.
- Wallace CS, Strike SA, Truskey GA (2007) Smooth muscle cell rigidity and extracellular matrix organization influence endothelial cell spreading and adhesion formation in coculture. *Am J Physiol Heart Circ Physiol* 293: H1978–1986.
- Wallace CS, Truskey GA (2010) Direct-contact co-culture between smooth muscle and endothelial cells inhibits TNF- $\alpha$ -mediated endothelial cell activation. *Am J Physiol Heart Circ Physiol* 299: H338–346.
- Ghosh K, Thodeti CK, Dudley AC, Mammoto A, Klagsbrun M, et al. (2008) Tumor-derived endothelial cells exhibit aberrant Rho-mediated mechanosensing and abnormal angiogenesis in vitro. *Proc Natl Acad Sci U S A* 105: 11305–11310.
- Engler AJ, Sen S, Sweeney HL, Discher DE (2006) Matrix elasticity directs stem cell lineage specification. *Cell* 126: 677–689.
- Provenzano PP, Keely PJ (2011) Mechanical signaling through the cytoskeleton regulates cell proliferation by coordinated focal adhesion and Rho GTPase signaling. *J Cell Sci* 124: 1195–1205.
- Paszek MJ, Zahir N, Johnson KR, Lakins JN, Rozenberg GI, et al. (2005) Tensional homeostasis and the malignant phenotype. *Cancer Cell* 8: 241–254.
- Bos JL, Rehmann H, Wittinghofer A (2007) GEFs and GAPs: critical elements in the control of small G proteins. *Cell* 129: 865–877.
- Parsons SJ, Parsons JT (2004) Src family kinases, key regulators of signal transduction. *Oncogene* 23: 7906–7909.
- Peng F, Zhang B, Ingram AJ, Gao B, Zhang Y, et al. (2010) Mechanical stretch-induced RhoA activation is mediated by the RhoGEF Vav2 in mesangial cells. *Cell Signal* 22: 34–40.
- Kodama A, Matozaki T, Fukuhara A, Kikyo M, Ichihashi M, et al. (2000) Involvement of an SHP-2-Rho small G protein pathway in hepatocyte growth factor/scatter factor-induced cell scattering. *Mol Biol Cell* 11: 2565–2575.
- Nagata K, Inagaki M (2005) Cytoskeletal modification of Rho guanine nucleotide exchange factor activity: identification of a Rho guanine nucleotide exchange factor as a binding partner for Sept9b, a mammalian septin. *Oncogene* 24: 65–76.
- Barral Y, Kinoshita M (2008) Structural insights shed light onto septin assemblies and function. *Curr Opin Cell Biol* 20: 12–18.
- Gilden J, Krummel MF (2010) Control of cortical rigidity by the cytoskeleton: emerging roles for septins. *Cytoskeleton (Hoboken)* 67: 477–486.
- Burrows JF, Chanduloy S, McIlhatton MA, Nagar H, Yeates K, et al. (2003) Altered expression of the septin gene, SEPT9, in ovarian neoplasia. *J Pathol* 201: 581–588.
- Kalikin LM, Sims HL, Petty EM (2000) Genomic and expression analyses of alternatively spliced transcripts of the MLL septin-like fusion gene (MSF) that map to a 17q25 region of loss in breast and ovarian tumors. *Genomics* 63: 165–172.
- Klein EA, Yin L, Kothapalli D, Castagnino P, Byfield FJ, et al. (2009) Cell-cycle control by physiological matrix elasticity and in vivo tissue stiffening. *Curr Biol* 19: 1511–1518.
- Lee RT, Richardson SG, Loree HM, Grodzinsky AJ, Gharib SA, et al. (1992) Prediction of mechanical properties of human atherosclerotic tissue by high-frequency intravascular ultrasound imaging. An in vitro study. *Arterioscler Thromb* 12: 1–5.
- Wang YL, Pelham RJ, Jr. (1998) Preparation of a flexible, porous polyacrylamide substrate for mechanical studies of cultured cells. *Methods Enzymol* 298: 489–496.
- Mammoto A, Huang S, Moore K, Oh P, Ingber DE (2004) Role of RhoA, mDia, and ROCK in cell shape-dependent control of the Skp2-p27kip1 pathway and the G1/S transition. *J Biol Chem* 279: 26323–26330.
- Amano M, Chihara K, Kimura K, Fukata Y, Nakamura N, et al. (1997) Formation of actin stress fibers and focal adhesions enhanced by Rho-kinase. *Science* 275: 1308–1311.
- Nagata K, Asano T, Nozawa Y, Inagaki M (2004) Biochemical and cell biological analyses of a mammalian septin complex, Sept7/9b/11. *J Biol Chem* 279: 55895–55904.

30. Jiang G, Huang AH, Cai Y, Tanase M, Sheetz MP (2006) Rigidity sensing at the leading edge through  $\alpha$ v $\beta$ 3 integrins and RPTP $\alpha$ . *Biophys J* 90: 1804–1809.
31. Matthews BD, Overby DR, Mannix R, Ingber DE (2006) Cellular adaptation to mechanical stress: role of integrins, Rho, cytoskeletal tension and mechanosensitive ion channels. *J Cell Sci* 119: 508–518.
32. Huveneers S, Danen EH (2009) Adhesion signaling - crosstalk between integrins, Src and Rho. *J Cell Sci* 122: 1059–1069.
33. Tilghman RW, Cowan CR, Mih JD, Koryakina Y, Gioeli D, et al. (2010) Matrix rigidity regulates cancer cell growth and cellular phenotype. *PLoS One* 5: e12905.
34. Solon J, Levental I, Sengupta K, Georges PC, Janmey PA (2007) Fibroblast adaptation and stiffness matching to soft elastic substrates. *Biophys J* 93: 4453–4461.
35. McBeath R, Pirone DM, Nelson CM, Bhadriraju K, Chen CS (2004) Cell shape, cytoskeletal tension, and RhoA regulate stem cell lineage commitment. *Dev Cell* 6: 483–495.
36. Besson A, Dowdy SF, Roberts JM (2008) CDK inhibitors: cell cycle regulators and beyond. *Dev Cell* 14: 159–169.
37. Kostic A, Lynch CD, Sheetz MP (2009) Differential matrix rigidity response in breast cancer cell lines correlates with the tissue tropism. *PLoS One* 4: e6361.
38. Peterson EA, Petty EM (2010) Conquering the complex world of human septins: implications for health and disease. *Clin Genet* 77: 511–524.
39. Spiliotis ET, Nelson WJ (2006) Here come the septins: novel polymers that coordinate intracellular functions and organization. *J Cell Sci* 119: 4–10.
40. Arthur WT, Petch LA, Burridge K (2000) Integrin engagement suppresses RhoA activity via a c-Src-dependent mechanism. *Curr Biol* 10: 719–722.
41. von Wichert G, Jiang G, Kostic A, De Vos K, Sap J, et al. (2003) RPTP- $\alpha$  acts as a transducer of mechanical force on  $\alpha$ v $\beta$ 3-integrin-cytoskeleton linkages. *J Cell Biol* 161: 143–153.
42. Roca-Cusachs P, Gauthier NC, Del Rio A, Sheetz MP (2009) Clustering of  $\alpha$ 5 $\beta$ 1 integrins determines adhesion strength whereas  $\alpha$ v $\beta$ 3 and talin enable mechanotransduction. *Proc Natl Acad Sci U S A* 106: 16245–16250.
43. White DP, Caswell PT, Norman JC (2007)  $\alpha$ v $\beta$ 3 and  $\alpha$ 5 $\beta$ 1 integrin recycling pathways dictate downstream Rho kinase signaling to regulate persistent cell migration. *J Cell Biol* 177: 515–525.
44. Miao H, Li S, Hu YL, Yuan S, Zhao Y, et al. (2002) Differential regulation of Rho GTPases by  $\beta$ 1 and  $\beta$ 3 integrins: the role of an extracellular domain of integrin in intracellular signaling. *J Cell Sci* 115: 2199–2206.
45. Wei WC, Lin HH, Shen MR, Tang MJ (2008) Mechanosensing machinery for cells under low substratum rigidity. *Am J Physiol Cell Physiol* 295: C1579–1589.
46. Katsumi A, Orr AW, Tzima E, Schwartz MA (2004) Integrins in mechanotransduction. *J Biol Chem* 279: 12001–12004.
47. Peng X, Huang J, Xiong C, Fang J (2012) Cell adhesion nucleation regulated by substrate stiffness: a Monte Carlo study. *J Biomech* 45: 116–122.
48. Hynes RO (2002) Integrins: bidirectional, allosteric signaling machines. *Cell* 110: 673–687.
49. Stupack DG, Puente XS, Boutsabouloy S, Storgard CM, Cheres DA (2001) Apoptosis of adherent cells by recruitment of caspase-8 to unligated integrins. *J Cell Biol* 155: 459–470.
50. Brooks PC, Montgomery AM, Rosenfeld M, Reisfeld RA, Hu T, et al. (1994) Integrin  $\alpha$ v $\beta$ 3 antagonists promote tumor regression by inducing apoptosis of angiogenic blood vessels. *Cell* 79: 1157–1164.
51. Jaffe EA, Nachman RL, Becker CG, Minick CR (1973) Culture of human endothelial cells derived from umbilical veins. Identification by morphologic and immunologic criteria. *J Clin Invest* 52: 2745–2756.
52. Gilchrist CL, Darling EM, Chen J, Setton LA (2011) Extracellular matrix ligand and stiffness modulate immature nucleus pulposus cell-cell interactions. *PLoS One* 6: e27170.
